# Supplementary material
Source: Copernicus journal article supplement (doi:10.5194/egusphere-2026-2338)
Supplement: Supplementary file 1 [file egusphere-2026-2338-supplement.pdf]

Supplement

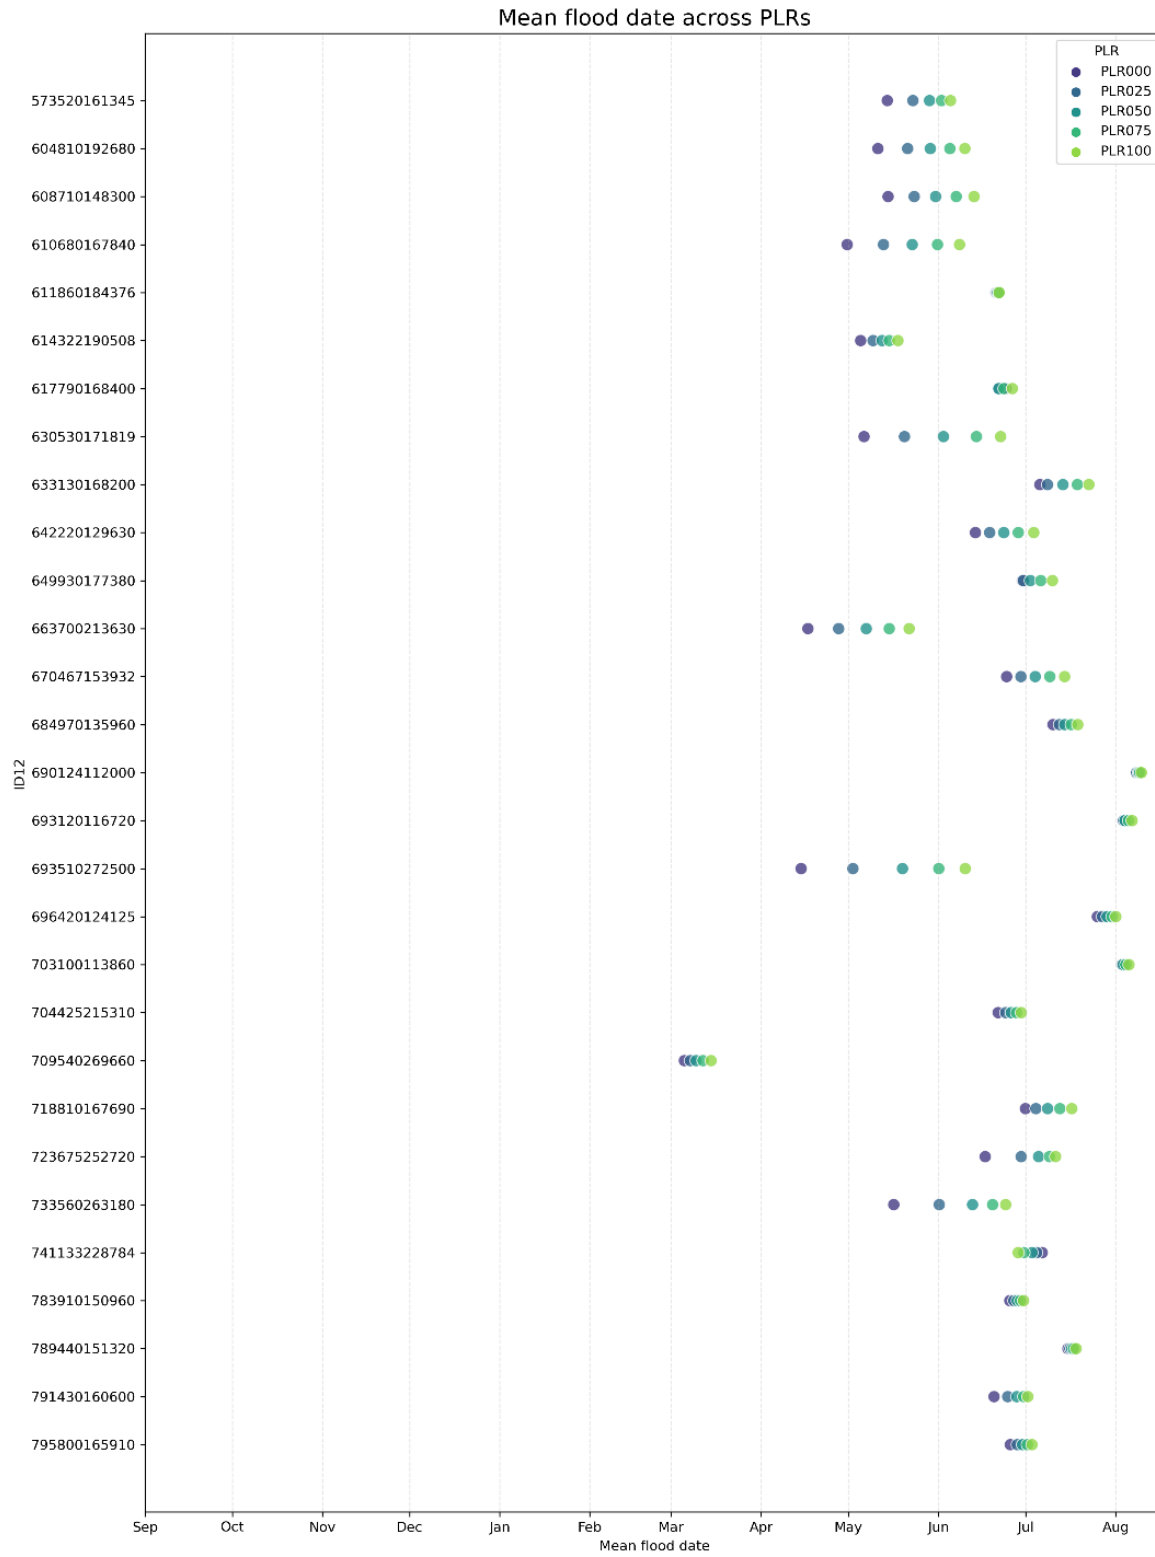

Figure S1 Mean monthly date of flood occurrence for all catchments and PLRs

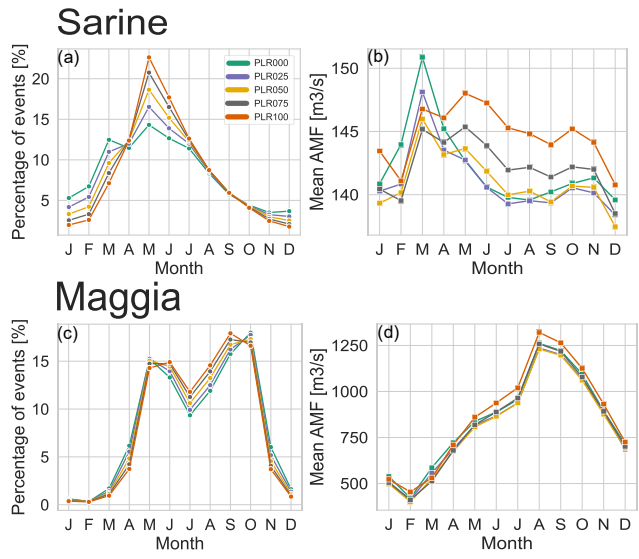

Figure S2 Percentage of AMFs per month simulated with varying PLR\_HBV only for the (a) Sarine and (b) Maggia catchments, and their corresponding mean magnitudes in panels b and d respectively.
